# Supplementary material
Source: PubMed Central journal article supplement (PMC4311553)

# Antiproliferative and Antimalarial Sesquiterpene Lactones from

## *Piptocoma antillana* from Puerto Rico

Yixi Liu<sup>a</sup>, L. Harinantenaina Rakotondraibe<sup>a,d</sup>, Peggy J. Brodie<sup>a</sup>, Jessica D. Wiley<sup>b</sup>, Maria B. Cassera<sup>b</sup>,  
Michael Goetz<sup>c</sup>, and David G. I. Kingston<sup>a,\*</sup>

<sup>a</sup>Department of Chemistry and Virginia Tech Center for Drug Discovery, M/C 0212, Virginia Tech, Blacksburg, VA 24061, United States

<sup>b</sup>Department of Biochemistry and Virginia Tech Center for Drug Discovery, M/C 0308, Virginia Tech, Blacksburg, VA 24061, United States

<sup>c</sup>Natural Products Discovery Institute, 3805 Old Easton Road, Doylestown, PA 18902, United States

<sup>d</sup>Present address: College of Pharmacy, Division of Medicinal Chemistry and Pharmacognosy, The Ohio State University, Columbus, OH 43210, United States

### *Supporting Information*

1. Title page
2. <sup>1</sup>H NMR spectrum of compound **1**
3. <sup>13</sup>C NMR spectrum of compound **1**
4. <sup>1</sup>H NMR spectrum of compound **2**
5. <sup>13</sup>C NMR spectrum of compound **2**
6. <sup>1</sup>H NMR spectrum of compound **3**
7. <sup>1</sup>H NMR spectrum of compound **4**

Chart 1. <sup>1</sup>H NMR spectrum of compound 1

Compound 1

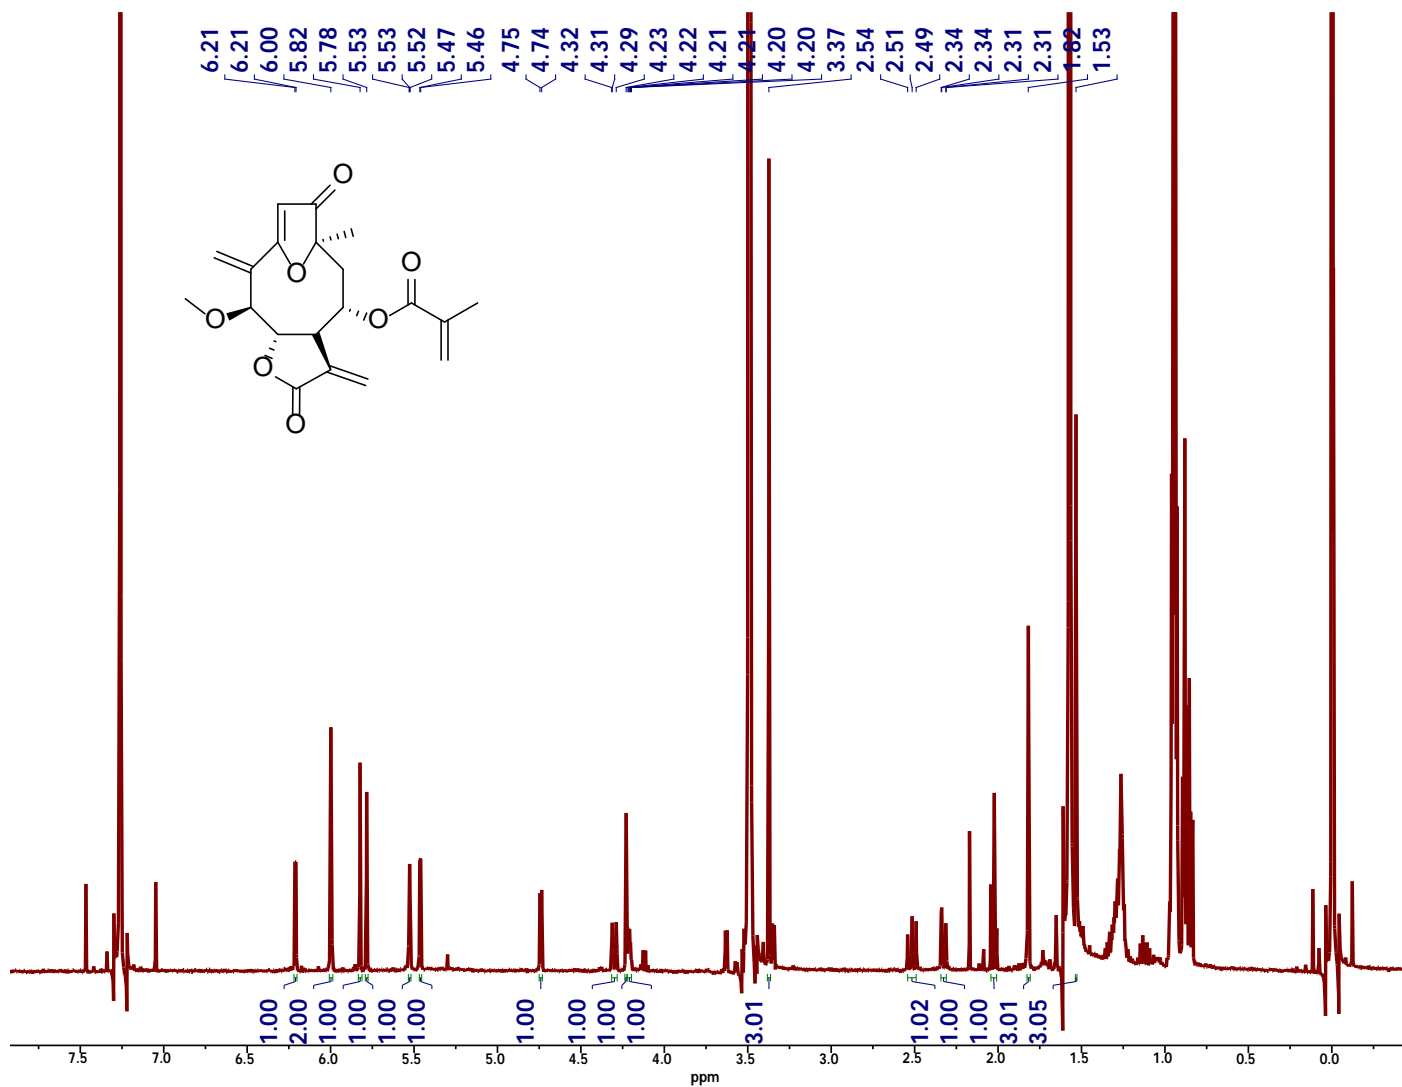

# Chart 2. $^{13}\text{C}$ NMR spectrum of compound 1

Compound 1

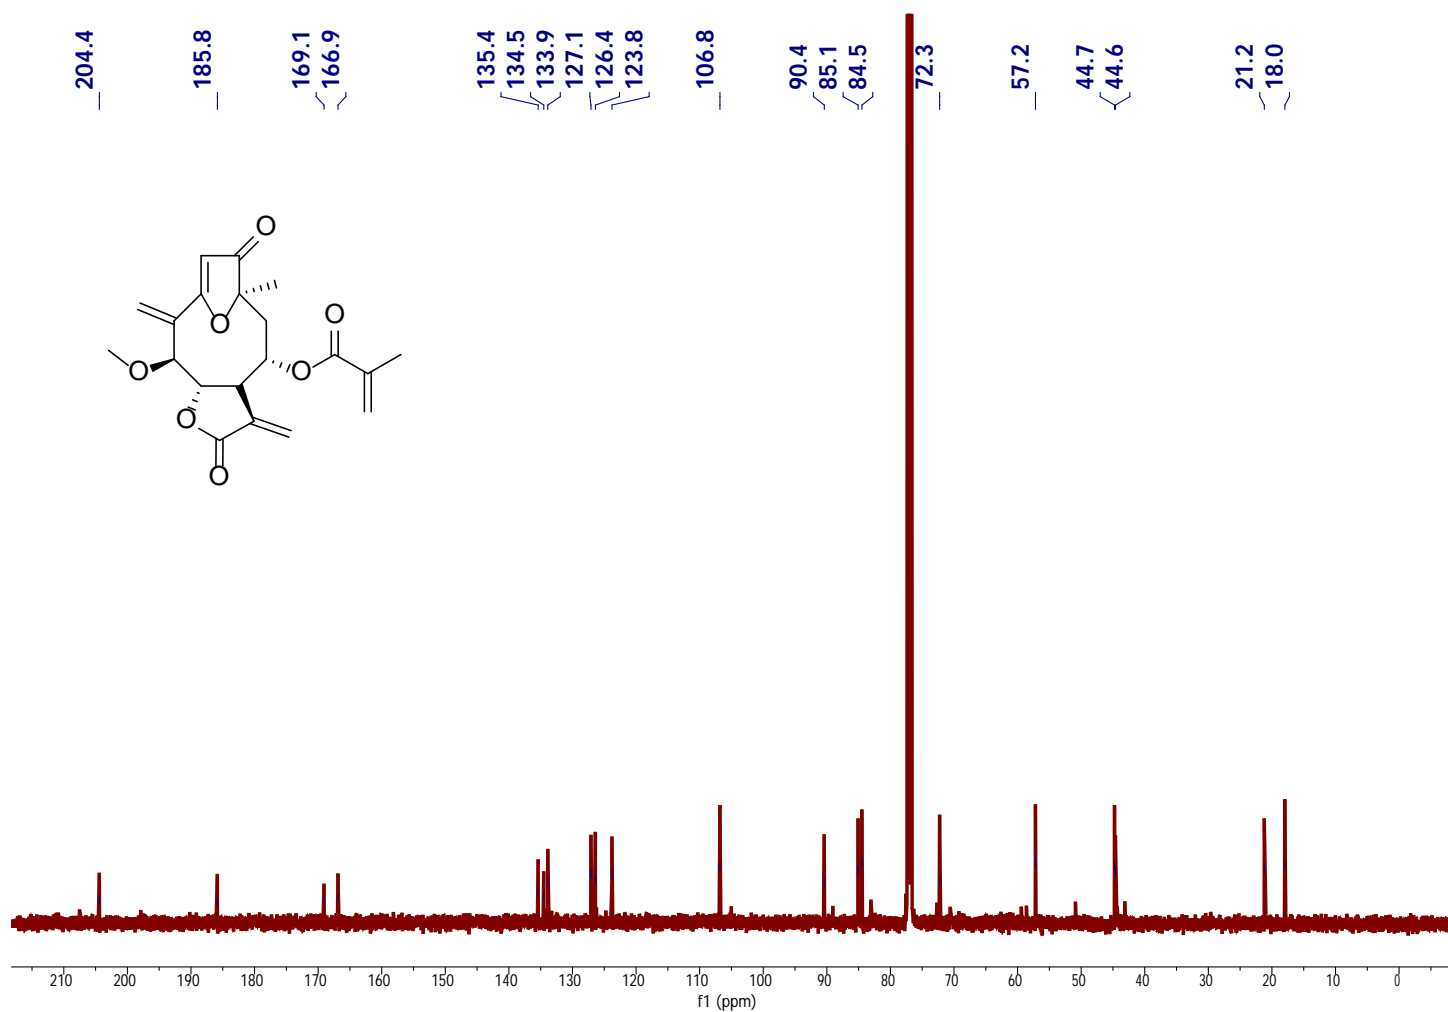



Chart 4.  $^{13}\text{C}$  NMR spectrum of compound 2

Compound 2

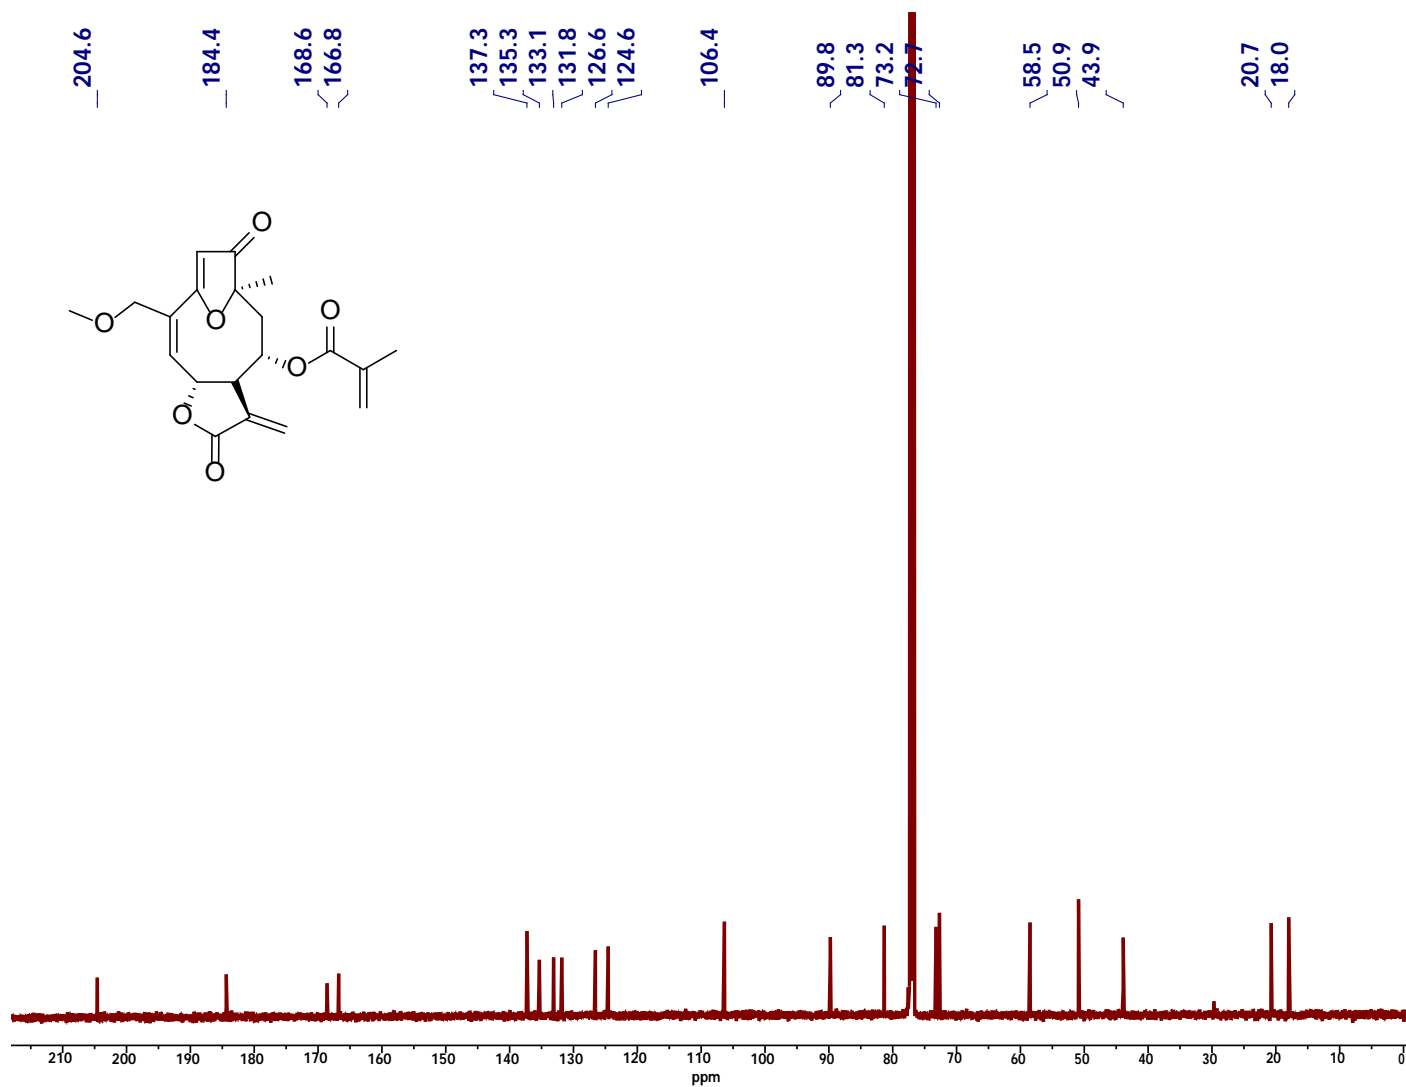

Chart 5. <sup>1</sup>H NMR spectrum of compound 3

Compound 3

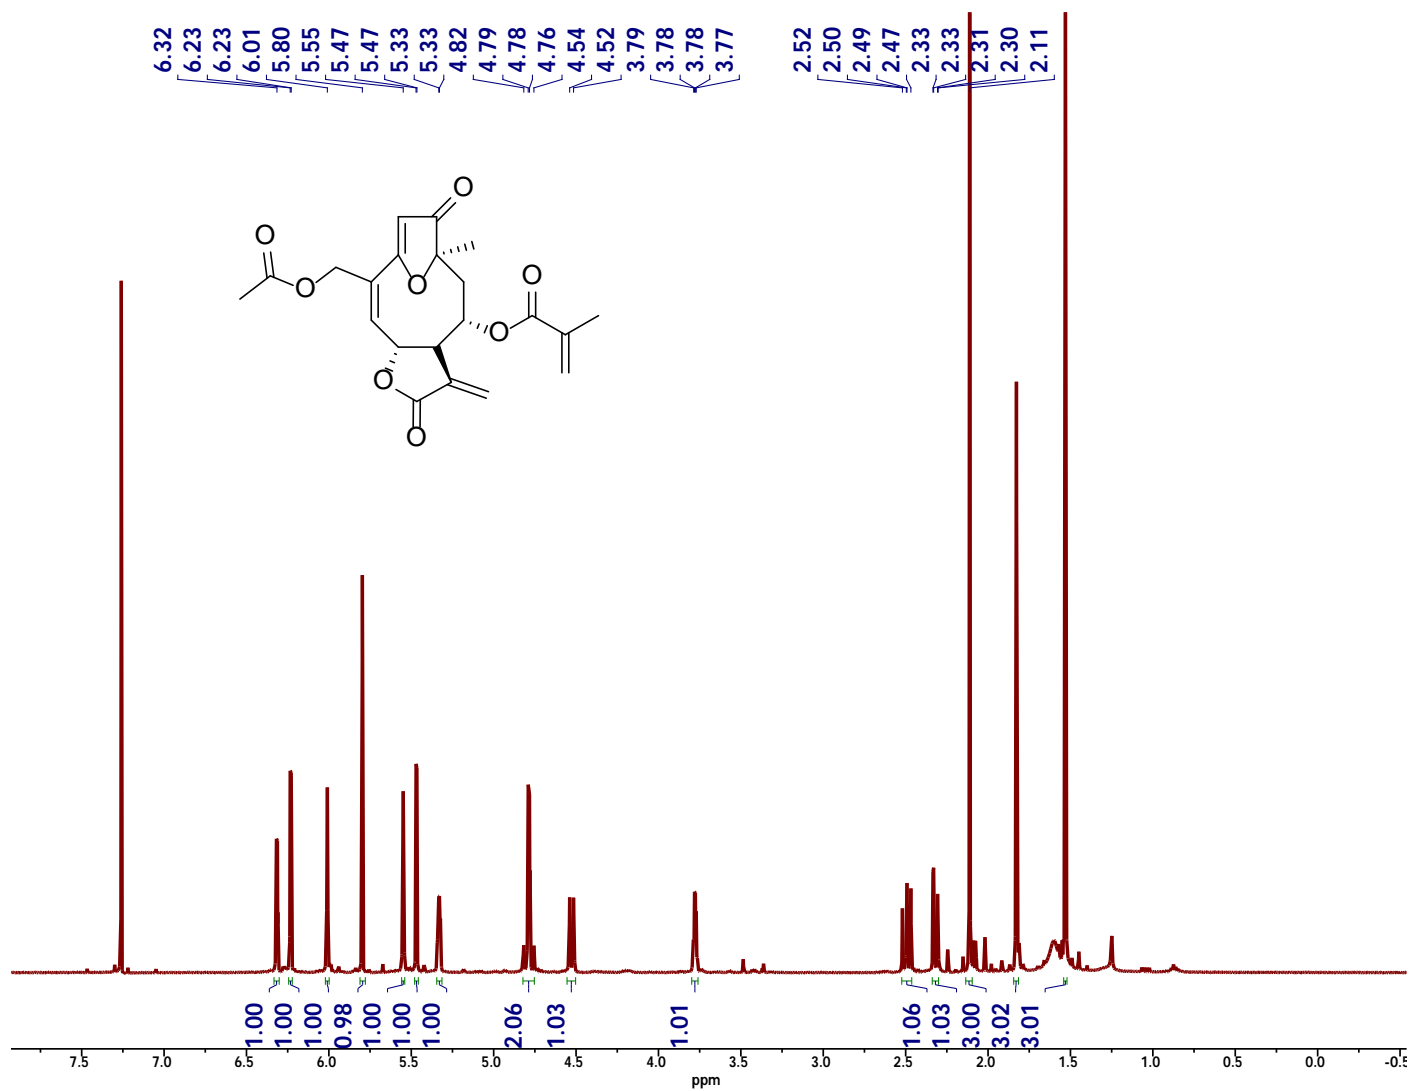

Chart 6.  $^1\text{H}$  NMR spectrum of compound 4

Compound 4

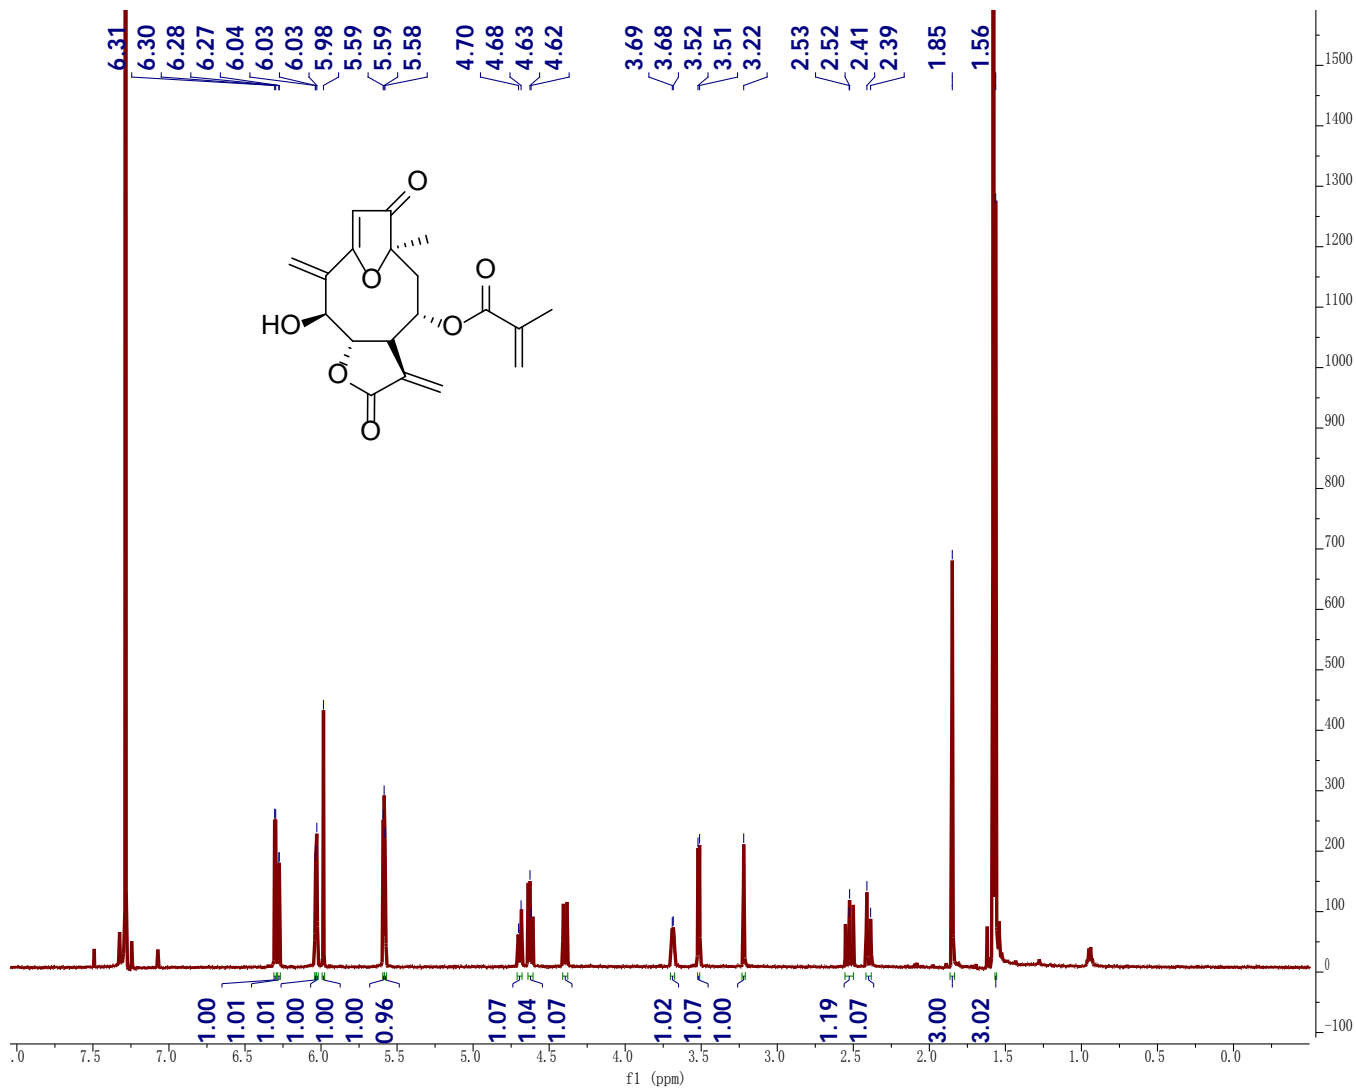

Supplement: NIHMS658675-supplement-Piptocoma_SI.pdf [file NIHMS658675-supplement-Piptocoma_SI.pdf]
